# Supplementary material
Source: Springer Nature journal article supplement (https://www.springermedizin.de/resource/supplementary/12936_2011_1673_MOESM1_ESM.pdf/9542338)

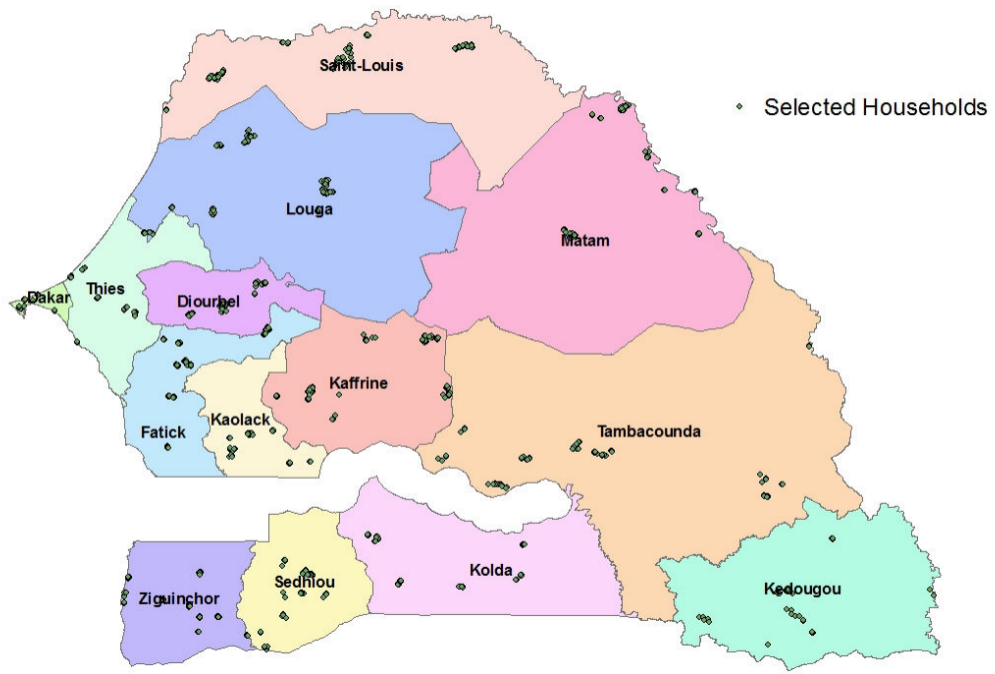

Supplement: MOESM1 [file 9542338]
